# Supplementary material for: Opportunities and Challenges in Studies of Host-Pathogen Interactions and Management of Verticillium dahliae in Tomatoes
Source: PubMed Central journal article supplement (PMC7700276; doi:10.3390/plants9111622), 2020-11-22
Supplement: plants-09-01622-s001.pdf [file plants-09-01622-s001.pdf]

**Table S1.** Disease compatibility of specific combinations of race-specific secreted effectors (Ave1 and V2) on resistant cultivars of tomatoes containing different combinations of the race 1 (Ve1) and race 2 (V2) resistance phenotypes.

| Race (isolates)        | Race gene  | Resistance combination |           |           |           |
|------------------------|------------|------------------------|-----------|-----------|-----------|
|                        |            | Ve1-/V2-               | Ve1+/V2+  | Ve1+/V2-  | Ve1-/V2+  |
| Race 1/2 (Le1087, JR2) | Ave1+/Av2+ | Disease                | Resistant | Resistant | Resistant |
| Race 2 (To22, Ca36)    | Ave1-/Av2+ | Disease                | Resistant | Disease   | Resistant |
| Race 3 (HoMCF, KJ14a)  | Ave1-/Av2- | Disease                | Disease   | Disease   | Disease   |
| Race 1/3 (Vdp4)        | Ave1+/Av2- | Disease                | Resistant | Resistant | Disease   |

**Table S2.** Biocontrol agents (BCAs) and biologicals with biocontrol activity against *Verticillium dahliae*.

| Biocontrol organism                        | Source                          | Mechanism of action /efficacy                                                                                    | References |
|--------------------------------------------|---------------------------------|------------------------------------------------------------------------------------------------------------------|------------|
| <i>Acinetobacter calcoaceticus</i> FS339   | Root (Tomato)                   | Reduced mycelial growth, reduced disease index, increased chitinase, siderophores, protease activity             | [249]      |
| <i>Bacillus axarquiensis</i> TUBP1 protein | Rhizosphere (Cotton)            | Anomalies in fungal hyphae and conidia, reduced spore germination, targeted plasma membrane of <i>V. dahliae</i> | [250]      |
| <i>Bacillus</i> spp.                       | Composted ginned cotton residue | Reduce disease severity and wilt symptoms, antibiosis                                                            | [161]      |
| <i>Bacillus thuringiensis</i>              | Rhizosphere (Tomato)            | Mycolitic chitinases, polypeptide synthetases, bacillibactin                                                     | [251]      |
| <i>Bacillus velezensis</i> AL7             | Soil (Cotton)                   | Synthesize antifungal antibiotics                                                                                | [153]      |

| Biocontrol organism                                                                    | Source                                                          | Mechanism of action /efficacy                                                                                                         | References |
|----------------------------------------------------------------------------------------|-----------------------------------------------------------------|---------------------------------------------------------------------------------------------------------------------------------------|------------|
| <i>Bacillus velezensis</i> C2                                                          | Endophyte (Tomato)                                              | Reduced disease incidence, antifungal activities (synthesis of lipopeptides, presence of volatile metabolites, produce lytic enzymes) | [252]      |
| <i>Bacillus velezensis</i> OEE1                                                        | Endophyte (Olive)                                               | Reduced fungal growth (92%), disease severity index, percentage of dead plants, and microsclerotia density                            | [159]      |
| <i>Burkholderia gladioli</i> pv. <i>agaricicola</i>                                    | -                                                               | Reduced mycelial growth and disease incidence                                                                                         | [253]      |
| Cell-free mix of <i>Sphingobacterium</i> A1 and <i>Bacillus tequilensis</i> C-9 (1:9)  | Rhizosphere (A1 from <i>Resina ferulae</i> and C-9 from cotton) | Reduced spore production (97.8%), germination (100%), and virulence protein of <i>V. dahliae</i>                                      | [155]      |
| <i>Chaetomium globosum</i> CEF-082                                                     | Endophyte (Cotton)                                              | Biocontrol effect 59%, Regulate multiple metabolic pathways, induce defense responses                                                 | [254]      |
| <i>Cryptoseria myriophylloides</i> , <i>Laminaria digitata</i> , <i>Fucus spiralis</i> | Algal extracts                                                  | Reduced disease severity, Increase defense response in tomato due to polyphenol oxidases, peroxidases                                 | [255]      |
| The essential oil from <i>Thymus</i> spp.                                              | Thyme                                                           | Inhibition of mycelia and microsclerotia; disease reduction                                                                           | [157]      |

| Biocontrol organism                       | Source                  | Mechanism of action /efficacy                                                                                                                                                | References |
|-------------------------------------------|-------------------------|------------------------------------------------------------------------------------------------------------------------------------------------------------------------------|------------|
| <i>Fusarium solani</i> CEF559             | Endophyte (cotton)      | Reduced colony growth (75%) and sporulation (80), PR genes and genes in lignin metabolism pathway upregulated, greenhouse control efficacy (60%) and field efficacy (30-56%) | [160]      |
| <i>Metarhizium brunneum</i>               | -                       | Reduce germination of microsclerotia, inhibited the hyphal formation                                                                                                         | [256]      |
| <i>Paenibacillus polymyxa</i> ShX301      | Rhizosphere (Cotton)    | Reduced disease incidence and disease severity                                                                                                                               | [257]      |
| <i>Pseudomonas fluorescences</i> FS167    | Root endophyte (Tomato) | Reduced mycelial growth, reduced disease index, chitinase, siderophores, protease                                                                                            | [249]      |
| <i>Pseudomonas mosselli</i> FS67          | Root endophyte (Tomato) | Reduced mycelial growth, reduced disease index, siderophores                                                                                                                 | [249]      |
| <i>Pseudomonas</i> spp.                   | Rhizosphere (Olive)     | Reduced disease onset and development, disease incidence, plant mortality, phytase, and catalase activities                                                                  | [258]      |
| <i>Purpureocillium lilacinum</i> QLP12    | Soil (Eggplant)         | Reduce disease index in greenhouse and field                                                                                                                                 | [259]      |
| <i>Stenotrophomonas maltophilia</i> FS300 | Root endophyte (Tomato) | Reduced mycelial growth, reduced disease index, chitinase, siderophores, protease                                                                                            | [249]      |
| <i>Trichoderma atroviride</i>             |                         | Antifungal activity                                                                                                                                                          | [154]      |

| Biocontrol organism                     | Source                     | Mechanism of action /efficacy                                                                                                   | References |
|-----------------------------------------|----------------------------|---------------------------------------------------------------------------------------------------------------------------------|------------|
| <i>Trichoderma harzianum</i>            | Rhizosphere<br>(Pistachio) | Reduced mycelial growth and disease severity, mycoparasitism                                                                    | [260]      |
| Triterpene derivatives<br>(at 10 µg/ml) | Latex (Euphorbia)          | Reduced disease severity, stunting, and vascular discoloration; enhanced peroxidase and polyphenol oxidase activities in tomato | [158]      |

**Table S3.** Some examples of organic amendments (OAs) with suppressiveness against *Verticillium dahliae*.

| Organic amendments            | Test crop/source       | Mechanism of action                                                                                                                                                | References |
|-------------------------------|------------------------|--------------------------------------------------------------------------------------------------------------------------------------------------------------------|------------|
| Solid olive oil waste compost | Olive                  | Reduce mycelial growth; and microsclerotia viability (52%-76%)                                                                                                     | [261]      |
| Olive mill compost            | Cotton                 | Low β-glucosidase activity; high oligotrophic actinomycete populations, Mycelial growth inhibition, Reduced disease severity, lower microsclerotial concentrations | [262]      |
| Broccoli residue              | Rotation with eggplant | Reduced disease incidence by 53%, reduced <i>V. dahliae</i> DNA in soil                                                                                            | [263]      |
| Compost tea                   | Corn straw             | Reduced mycelial growth and conidial germination by 91% and 78% respectively in strawberry; control efficacy of 42% in greenhouse                                  | [264]      |

| Organic amendments                                                                                                                | Test crop/source | Mechanism of action                                                                                                                                              | References |
|-----------------------------------------------------------------------------------------------------------------------------------|------------------|------------------------------------------------------------------------------------------------------------------------------------------------------------------|------------|
| Grape marc compost                                                                                                                | Olive            | Reduced microsclerotia density; disease incidence;                                                                                                               | [156,265]  |
| Plant compost (grape pomace compost; olive pomace/dairy manure compost; mixed crop residue compost)                               | Bell pepper      | reduced pathogen population in fields (29%-42%) up to 14 weeks post-application; Compost extracts reduced <i>V. dahliae</i> growth by 25-50% in Petri dish assay | [163]      |
| Fresh manure (4 kg m <sup>-2</sup> sheep manure + 1 kg m <sup>-2</sup> composted poultry litter) covered with transparent plastic | Bell pepper      | Reduced disease incidence to less than 1%                                                                                                                        | [167]      |
| 4% Dried spearmint or oregano                                                                                                     | Tomato           | Reduced disease to visually no symptoms                                                                                                                          | [266]      |
| Composts with various compositions                                                                                                | Eggplant         | Reduced disease indicated by disease suppression index                                                                                                           | [267]      |
| Tomato waste compost                                                                                                              | Eggplant         | Reduced disease severity and fungal colonization                                                                                                                 | [268]      |
| Turkey litter compost                                                                                                             | Eggplant         | Reduced disease severity                                                                                                                                         | [268]      |
| Various compositions of steam-explosion liquid waste, Agro-industrial residues/waste, and plant green waste composts              | Eggplant         | Reduced disease indicated by disease suppression index (43%-65%), showed richness in potential biocontrol agents                                                 | [166]      |

| Organic amendments                                                                                  | Test crop/source | Mechanism of action                                                                | References |
|-----------------------------------------------------------------------------------------------------|------------------|------------------------------------------------------------------------------------|------------|
| Mustard                                                                                             | Tomato           | Suppressed verticillium wilt with “biofumigant” properties                         | [164]      |
| Sudangrass                                                                                          | Tomato           | Suppressed verticillium wilt with “biofumigant” properties                         | [164]      |
| Plant-based compost                                                                                 | Tomato           | Reduced disease intensity, showed richness in culturable biocontrol agents         | [162]      |
| Compost of winery residues including grape stalks and grape pomace                                  | Eggplant         | Reduced disease incidence, severity and plant mortality, high total phenol content | [269]      |
| Compost of tomato pulp with sawdust and chipping wood as bulking agents with a ratio of 2:1:1 v/v/v | Eggplant         | Reduced disease incidence, severity and plant mortality, high total phenol content | [269]      |
| Compost of organic fraction of municipal solid waste                                                | Eggplant         | Reduced disease incidence, severity and plant mortality, high total phenol content | [269]      |
| Compost consisted of 73% olive mill extracted press cake, 24% wastewater, and 3% olive leaves       | Eggplant         | Reduced disease incidence, severity and plant mortality, high total phenol content | [269]      |

**Table S4.** Examples of sources of carbon from recent studies for anaerobic soil disinfestation of soil-borne pathogens including *Verticillium dahliae*.

| The carbon source for ASD | Host plant                          | Targeted pathogen                                                                                                                                                                                                                    | References            |
|---------------------------|-------------------------------------|--------------------------------------------------------------------------------------------------------------------------------------------------------------------------------------------------------------------------------------|-----------------------|
| Alfalfa                   | Cucumber                            | <i>Rhizoctonia solani</i>                                                                                                                                                                                                            | [174,270]             |
| Bean dregs                | -                                   | <i>Fusarium oxysporum</i>                                                                                                                                                                                                            | [137]                 |
| Broccoli + Rice bran      | Strawberry                          | <i>Fusarium oxysporum</i> f. sp. <i>fragariae</i> ; <i>Verticillium dahliae</i>                                                                                                                                                      | [271]                 |
| Corn straw                | -                                   | -                                                                                                                                                                                                                                    | [174]                 |
| Ethanol                   | Tomato;<br>Cucumber;<br>Strawberry  | <i>Fusarium oxysporum</i> f. sp. <i>lycopersici</i> ; <i>Fusarium oxysporum</i> ; <i>Verticillium dahliae</i> ; <i>Pyrenochaeta lycopersici</i> ; <i>Colletotrichum coccodes</i> ; <i>Rhizoctonia solani</i> <i>Meloidogyne</i> spp. | [137,140,270,272,273] |
| FL-104 rye + Rice bran    | Strawberry                          | <i>Fusarium oxysporum</i> f. sp. <i>fragariae</i>                                                                                                                                                                                    | [271]                 |
| Grape pomace              | Strawberry                          | <i>Verticillium dahliae</i>                                                                                                                                                                                                          | [140,175,274]         |
| Italian rye + Rice bran   | Strawberry                          | <i>Fusarium oxysporum</i> f. sp. <i>fragariae</i>                                                                                                                                                                                    | [271]                 |
| Molasses                  | Tomato<br>Lettuce;<br>Mustard green | <i>Plasmodiophora brassicae</i> ; <i>Meloidogyne</i> spp.                                                                                                                                                                            | [169,273,275]         |

| The carbon source for ASD                 | Host plant | Targeted pathogen                                                                                 | References    |
|-------------------------------------------|------------|---------------------------------------------------------------------------------------------------|---------------|
|                                           |            | <i>Verticillium dahliae</i> ; <i>Pyrenochaeta lycopersici</i> ;<br><i>Colletotrichum coccodes</i> |               |
| Molasses + composted poultry litter (CPL) | Tomato     | <i>Meloidogyne</i> spp.                                                                           | [276]         |
| Mustard + Rice bran                       | Strawberry | <i>Fusarium oxysporum</i> f. sp. <i>fragariae</i>                                                 | [271]         |
| Mustard seed meal                         | Strawberry | <i>Verticillium dahliae</i>                                                                       | [140,169]     |
| Onion waste                               | Strawberry | <i>Verticillium dahliae</i>                                                                       | [140]         |
| Rice bran                                 | Strawberry | <i>Verticillium dahliae</i> ; <i>Fusarium oxysporum</i> f. sp. <i>fragariae</i>                   | [140,169,271] |
| Sudan grass + Rice bran                   | Strawberry | <i>Fusarium oxysporum</i> f. sp. <i>fragariae</i>                                                 | [271]         |
| Sugarcane bagasse                         | -          | <i>Fusarium oxysporum</i>                                                                         | [137]         |



| The carbon source for ASD | Host plant                | Targeted pathogen                                                                                                                                                                            | References    |
|---------------------------|---------------------------|----------------------------------------------------------------------------------------------------------------------------------------------------------------------------------------------|---------------|
| Tomato pomace             | -                         | -                                                                                                                                                                                            | [169,175,274] |
| Triticale + rice bran     | Strawberry                | <i>Fusarium oxysporum</i> f. sp. <i>fragariae</i>                                                                                                                                            | [271]         |
| Wheat bran                | Tomato;<br>Strawberry     | <i>Plasmodiophora brassicae</i> ; <i>Meloidogyne</i> spp.<br><br><i>Verticillium dahliae</i> ; <i>Pyrenochaeta lycopersici</i> ;<br><i>Colletotrichum coccodes</i> ; <i>Meloidogyne</i> spp. | [140,273,275] |
| Wheat bran + Molasses     | Lettuce;<br>Mustard green | <i>Plasmodiophora brassicae</i> ; <i>Meloidogyne</i> spp.                                                                                                                                    | [275]         |
